# Supplementary material
Source: HighWire-hosted journal article supplement (https://erj.ersjournals.com/content/57/6/2003338)
Supplement: inline-supplementary-material-1 [file inline-supplementary-material-1.pdf]

## Supplementary Files

### **The Effect of Low Dose Corticosteroids and Theophylline on the Risk of Acute Exacerbations of COPD. The TASCs Randomised Controlled Trial**

Christine R. Jenkins<sup>1</sup>, Fu-Qiang Wen<sup>2</sup>, Allison Martin<sup>1</sup>, Peter J. Barnes<sup>3</sup>, Bartolome Celli<sup>4</sup>, Nan-Shan Zhong<sup>5</sup>, Jin-Ping Zheng<sup>5</sup>, Anish Scaria<sup>1</sup>, Gian-Luca Di Tanna<sup>1</sup>, Thomas Bradbury<sup>1</sup>, Norbert Berend<sup>1</sup>, on behalf of the TASCs study investigators.

1. The George Institute for Global Health, Sydney and UNSW Sydney, Australia
2. West China Hospital, Sichuan University, Chengdu, China
3. National Heart & Lung Institute, Imperial College, London UK
4. Brigham and Women's Hospital, Boston MA, USA
5. State Key Laboratory of Respiratory Disease, National Clinical Research Centre for Respiratory Disease, First Affiliated Hospital of Guangzhou Medical University, Guangzhou, China.

## **Contents**

- Supplementary Note 1 Additional statistical comments
- Supplementary Note 2 Patients randomised with no follow up visit
- Supplementary Note 3 Study Oversight
- Supplementary Note 4 Study Centres and Site Principal Investigators
- Supplementary Figure 1 Time to withdrawal

## Supplementary Note 1

### Additional statistical comments

We initially planned to recruit 2400 patients, in order to have 90% power to detect a 20% risk reduction for exacerbations in the theophylline plus prednisone arm versus placebo, but our recruitment rate in the first 12 months suggested we could not meet this target with our allocated funding. We therefore reduced the power to 80%, noting this was the case for several published randomised controlled trials with COPD exacerbations as a primary outcome.

Based on a negative binomial distribution of COPD exacerbations with a dispersion parameter of 0.8, we estimated that 1650 patients would be required to detect a 20% relative risk reduction (80% power, 2-tailed alpha) for comparison of low dose theophylline (LDT) and low dose prednisone versus placebo for the primary outcome, the number of COPD exacerbations per patient over 48 weeks, annualised to 12 months in a 3-arm trial. In the primary outcome analysis, we pooled the placebo/placebo and LDT/placebo groups vs LDT and low dose prednisone, as detailed in the pre-specified statistical analysis plan.

The rationale for this was because the goal of the study was to see if LDT, for which there is an in vitro rationale for enhancing the benefit of corticosteroids, is effective in doing so in vivo. The pooling of Placebo + LDT data can be justified on the basis that there were data to show that LTD by itself is ineffective in reducing AECOPD vs Placebo, which we also found in TASCs. This change was made at the time of the reduced target recruitment and restriction to a China-only study. It was prespecified in the Statistical Analysis Plan (SAP). In it we wrote "To overcome the potential issue of multiple testing among three treatment groups, the primary comparison is pre-specified as the treatment group of low-dose theophylline and low dose oral prednisone versus combination of other two groups (low-dose theophylline alone and placebo group)". In the SAP we had also specified a hierarchical process where, if the primary comparison was found as statistically significant, the comparison between the two treatment groups versus placebo group separately would have been conducted.

For completeness and exploratory purposes, we have calculated the following Rate Ratios:

Low-dose Theophylline + placebo vs placebo: 0.866, 95% CI 0.728; 1.029, p=0.101 and

Low-dose Theophylline + Low dose oral Prednisone vs placebo : 0.895, 95% CI 0.755; 1.061, p=0.201

## **Supplementary Note 2**

### **Participants randomised with no follow up visit**

If participants provided any follow-up time, they were included in the Intention to Treat (ITT) analysis. A sensitivity analysis was performed where those participants who had zero follow-up were not included in the analysis to ensure that the results did not differ from the PP analysis. No (multiple) imputation procedure has been employed.

## **Supplementary Note 3**

### **Study Oversight**

An international steering committee of investigators was responsible for broad oversight of the TASCs trial and met face to face twice yearly during the study. The study team, based at The George Institute for Global Health (TGI) met weekly or more often with the study team in Beijing throughout the study. A Data Safety Monitoring Committee (DSMC), independent of the trial investigators and sites, performed an ongoing review of the predefined safety parameters and overall study conduct. The DSMC was comprised of experts in clinical trials, bio-statistics and respiratory medicine and reviewed unblinded data on participant characteristics and AEs at 12 monthly intervals during the study. The DSMC reported back formally to the study investigators with a recommendation to continue or discontinue the study, or requesting further information. Principal outcomes monitored by the DSMC included deaths, hospitalizations, exacerbations and SAEs of interest.

## Supplementary Note 4

### The Theophylline and Steroids in COPD Study (TASCS) Centres and Investigators

| Site No. | Site Name                                                   | Site Principal Investigator |
|----------|-------------------------------------------------------------|-----------------------------|
| 001      | West China Hospital of Sichuan University                   | WEN Fuqiang                 |
| 002      | The First Affiliated Hospital of Guangzhou Medical College  | ZHONG Nanshan               |
| 004      | Beijing Chao-yang Hospital, Capital Medical University      | Lin Yingxiang               |
| 010      | Daping Hospital, 3rd Military Medical University Cui        | Shehuai                     |
| 012      | The Military General Hospital of Chengdu PLA                | Xiao Zhenliang              |
| 014      | First Hospital of Jilin University                          | Li Dan                      |
| 019      | People's Hospital of Henan Province                         | MA Lijun                    |
| 025      | The First Affiliated Hospital of Guangxi Medical University | ZhongXiaoning               |
| 026      | Jiangsu Provincial Hospital of State Organ                  | Liu Jiannan                 |
| 029      | The First Affiliated Hospital of Nanchang University        | Zhang Wei                   |
| 033      | The Fouth Hospital of China Medical University              | Wang Xiaoge                 |
| 035      | The First Affiliated Hospital of Baotou Medical College     | HE Huijie                   |
| 036      | Hejian Municipal People's Hospital                          | DU Baoliang                 |
| 038      | Yutian County Hospital, Hebei Province                      | WANG Jinchao                |
| 039      | The First People's Hospital of Zunyi                        | LIU Daishun                 |
| 040      | Leshan People's Hospital                                    | Wei Maogang                 |
| 041      | Neijiang First People's Hospital                            | Zhang Yong                  |
| 042      | Chengdu Second People's Hospital                            | Yan Hao                     |
| 044      | Bazhong Central Hospital                                    | Zhang Shiguo                |
| 045      | Affiliated Hospital of North Sichuan Medical College        | Chen Shaoping               |
| 046      | Third People's Hospital of Mianyang                         | Wang Kailv                  |
| 047      | Chengdu Fifth People's Hospital                             | Wang Jun                    |
| 048      | The Nuclear Industry 416 Hospital                           | Xiong Shuguang              |
| 049      | The first people's hospital of liangshan state              | LI LI                       |
| 051      | Sichuan Mianyang 404 Hospital                               | Wang Limin                  |
| 052      | Suining Central Hospital                                    | He Zhengguang               |
| 053      | Dazhou Central Hospital                                     | Wang Hongjun                |

| <b>Site No.</b> | <b>Site Name</b>                                                              | <b>Site Principal Investigator</b> |
|-----------------|-------------------------------------------------------------------------------|------------------------------------|
| 057             | Chinese and Western medicine Hospital of Panzhihua                            | Hu Qiang                           |
| 058             | Yuxian People's Hospital                                                      | Guo Dongshuang                     |
| 059             | Pengzhou People's Hospital                                                    | Weng Bangqiong                     |
| 060             | Traditional Chinese Medicine Hospital Affiliated to Luzhou<br>Medical College | Ao Suhua                           |
| 061             | People's hospital Changji Hui Autonomous Prefecture, Xinjia                   | Guo Yang                           |
| 063             | Chengdu Qingbaijiang People's Hospital                                        | Liu Zehui                          |
| 064             | Wendeng Municipal hospital                                                    | Zhao Jinguo                        |
| 065             | Dong'e people's hospital, Shan Dong Province                                  | Cui Jiadong                        |
| 066             | Henan Dancheng County People's Hospital                                       | Yang Yuwang                        |
| 067             | Jiangyou People's Hospital                                                    | Wang Jun                           |

Supplementary FIGURE S1

Time to Withdrawal

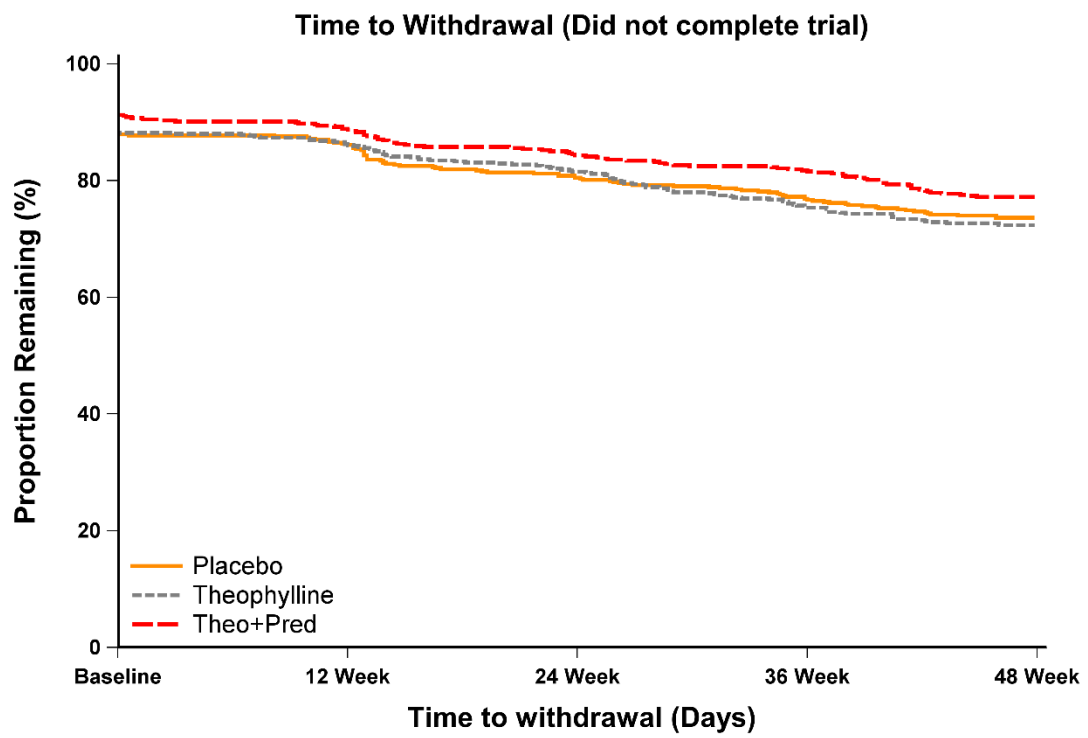

| No. at risk :  | Baseline | 12 Week | 24 Week | 36 Week | 48 Week |
|----------------|----------|---------|---------|---------|---------|
| Placebo :      | 554      | 479     | 448     | 428     | 373     |
| Theophylline : | 568      | 492     | 464     | 430     | 377     |
| Theo+Pred :    | 548      | 489     | 463     | 449     | 392     |
