# Supplementary material
Source: HighWire-hosted journal article supplement (https://erj.ersjournals.com/content/57/6/2003338)
Supplement: inline-supplementary-material-2 [file inline-supplementary-material-2.pdf]

## SUPPLEMENTARY TABLES S1 and S2

### Supplementary Table S1

Serum theophylline levels in each of the three study arms in the ITT population at baseline, 12 weeks and 48 weeks

| Theophylline (mg/L)    | Placebo (N=554) | Low-dose<br>Theophylline +<br>placebo (N=568) | Low-dose<br>Theophylline + Low<br>dose oral Prednisone<br>(N=548) |
|------------------------|-----------------|-----------------------------------------------|-------------------------------------------------------------------|
| <b>Baseline</b>        |                 |                                               |                                                                   |
| <b>N</b>               | 23              | 28                                            | 24                                                                |
| <b>Mean (SD)</b>       | 0.8 (2.1)       | 1.3 (2.2)                                     | 3.5 (5.0)                                                         |
| <b>Median (Q1; Q3)</b> | 0.1 (0.0; 0.1)  | 0.1 (0.0; 1.2)                                | 1.2 (0.0; 5.0)                                                    |
| <b>Min, max</b>        | 0, 8            | 0, 8                                          | 0, 19                                                             |
| <b>Week 12</b>         |                 |                                               |                                                                   |
| <b>N</b>               | 22              | 25                                            | 24                                                                |
| <b>Mean (SD)</b>       | 0.7 (2.0)       | 2.5 (3.0)                                     | 4.4 (5.7)                                                         |
| <b>Median (Q1; Q3)</b> | 0.1 (0.0; 0.1)  | 1.1 (0.1; 3.6)                                | 2.1 (0.1; 6.9)                                                    |
| <b>Min, max</b>        | 0, 9            | 0, 10                                         | 0, 20                                                             |
| <b>Week 48</b>         |                 |                                               |                                                                   |
| <b>N</b>               | 21              | 24                                            | 24                                                                |
| <b>Mean (SD)</b>       | 0.7 (2.0)       | 3.1 (2.9)                                     | 4.8 (5.2)                                                         |
| <b>Median (Q1; Q3)</b> | 0.0 (0.0; 0.1)  | 2.6 (0.1; 5.0)                                | 3.7 (0.9; 6.3)                                                    |
| <b>Min, max</b>        | 0, 7            | 0, 11                                         | 0, 20                                                             |

**Supplementary Table S2**

Cortisol measurements at Week 50 in sub-sample of participants in ITT population

| <b>Cortisol assessment</b>                      | Placebo (N=554)         | Low-dose<br>Theophylline +<br>placebo (N=568) | Low-dose<br>Theophylline + Low<br>dose Prednisone<br>(N=548) |
|-------------------------------------------------|-------------------------|-----------------------------------------------|--------------------------------------------------------------|
| Participants in<br>cortisol testing<br>subgroup | 31 (5.5%)               | 30 (5.3%)                                     | 30 (5.5%)                                                    |
| S. cortisol<br>Week 50 (n)                      | 31                      | 30                                            | 30                                                           |
| Mean (SD) S.cortisol                            | 266.6 (138.5)           | 266.4 (139.9)                                 | 180.6 (105.5)                                                |
| Median<br>(Q1; Q3)                              | 256.8<br>(153.2; 367.2) | 245.0<br>(197.8; 342.9)                       | 184.5<br>(88.2; 242.1)                                       |
| Min Max                                         | 12, 588                 | 47, 727                                       | 18, 468                                                      |
