# Supplementary material
Source: HighWire-hosted journal article supplement (https://erj.ersjournals.com/content/57/6/2003338)
Supplement: inline-supplementary-material-3 [file inline-supplementary-material-3.pdf]

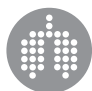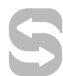

SHAREABLE PDF

# The effect of low-dose corticosteroids and theophylline on the risk of acute exacerbations of COPD: the TASCs randomised controlled trial

Christine R. Jenkins <sup>1,2</sup>, Fu-Qiang Wen<sup>3</sup>, Allison Martin<sup>1,2</sup>, Peter J. Barnes<sup>4</sup>, Bartolome Celli <sup>5</sup>, Nan-Shan Zhong<sup>6</sup>, Jin-Ping Zheng<sup>6</sup>, Anish Scaria<sup>1,2</sup>, Gian-Luca Di Tanna <sup>1,2</sup>, Thomas Bradbury<sup>1,2</sup> and Norbert Berend<sup>1,2</sup> on behalf of the TASCs study investigators

**Affiliations:** <sup>1</sup>The George Institute for Global Health, Sydney, Australia. <sup>2</sup>Faculty of Medicine, UNSW Sydney, Sydney, Australia. <sup>3</sup>West China Hospital, Sichuan University, Chengdu, China. <sup>4</sup>National Heart and Lung Institute, Imperial College London, London, UK. <sup>5</sup>Pulmonary and Critical Care Division, Brigham and Women's Hospital, Boston, MA, USA. <sup>6</sup>State Key Laboratory of Respiratory Disease, National Clinical Research Centre for Respiratory Disease, First Affiliated Hospital of Guangzhou Medical University, Guangzhou, China.

**Correspondence:** Christine R. Jenkins, The George Institute for Global Health, PO Box M201, Missenden Road, NSW 2050, Australia. E-mail: christine.jenkins@sydney.edu.au

@ERSpublications

**This large, rigorously conducted RCT showed that the combination of low-dose theophylline and prednisone did not affect exacerbation rate in patients with moderate to severe COPD in China** <https://bit.ly/2KSQ2BK>

**Cite this article as:** Jenkins CR, Wen F-Q, Martin A, *et al.* The effect of low-dose corticosteroids and theophylline on the risk of acute exacerbations of COPD: the TASCs randomised controlled trial. *Eur Respir J* 2021; 57: 2003338 [<https://doi.org/10.1183/13993003.03338-2020>].

This single-page version can be shared freely online.

## ABSTRACT

**Background:** The highest burden of chronic obstructive pulmonary disease (COPD) occurs in low- and middle-income countries. Low-cost oral medications, if effective, could enable affordable, accessible COPD treatment.

**Methods:** In this randomised, three-arm, double-blind, double-dummy, placebo-controlled study conducted in 37 centres in China, symptomatic patients with moderate to very severe COPD were randomised 1:1:1 to placebo twice daily plus placebo once daily, low-dose theophylline 100 mg twice daily plus placebo once daily or low-dose theophylline 100 mg twice daily plus low-dose oral prednisone 5 mg once daily for 48 weeks. The primary end-point was annualised exacerbation rate.

**Results:** 1670 subjects were randomised and 1242 completed the study (1142 with acceptable data at week 48). Subjects (75.7% male) had a mean age of 64.4 years, with mean $\pm$ SD baseline post-bronchodilator forced expiratory volume in 1 s (FEV<sub>1</sub>) 1.1 $\pm$ 0.4 L (42.2% predicted) and St George's Respiratory Questionnaire (SGRQ) score 45.8 $\pm$ 20.1. There were negligible differences between annualised exacerbation rates across the three treatments: 0.89 (95% CI 0.78–1.02) on theophylline plus prednisone, 0.86 (95% CI 0.75–0.99) on theophylline plus placebo and 1.00 (95% CI 0.87–1.14) on placebo. The rate ratio for theophylline plus prednisone *versus* pooled theophylline plus placebo and placebo was 0.96 (95% CI 0.83–1.12), for theophylline plus placebo *versus* placebo was 0.87 (95% CI 0.73–1.03; *p*=0.101) and for theophylline plus prednisone *versus* placebo was 0.90 (95% CI 0.76–1.06; *p*=0.201). Secondary outcomes of hospitalisations, FEV<sub>1</sub>, SGRQ and COPD Assessment Test score showed no statistically significant difference between treatment arms. Serious adverse events other than exacerbations were <2% and did not differ between treatment arms.

**Conclusions:** Low-dose theophylline alone or in combination with prednisone did not reduce exacerbation rates or clinically important secondary end-points compared with placebo.
